# Supplementary material
Source: MDPI journal article supplement (https://www.mdpi.com/2311-5629/9/4/97)
Supplement: s1 [file s1]

## Supplementary Information

### Investigating the potential of Greener-Porous Graphene for the treatment of organic pollutants in wastewater

Bhavya Joshi<sup>a\*</sup>, Ahmed M.E. Khalil<sup>a</sup>, Shaowei Zhang<sup>a#</sup>, Fayyaz A. Memon<sup>a</sup>

<sup>a</sup> Department of Engineering, University of Exeter, UK EX4 4QF

# Corresponding authors' e-mail addresses: bj300@exeter.ac.uk, f.a.memon@exeter.ac.uk, s.zhang@exeter.ac.uk,

#### S1. Kinetic Pseudo 1<sup>st</sup> order Modelling Graphs

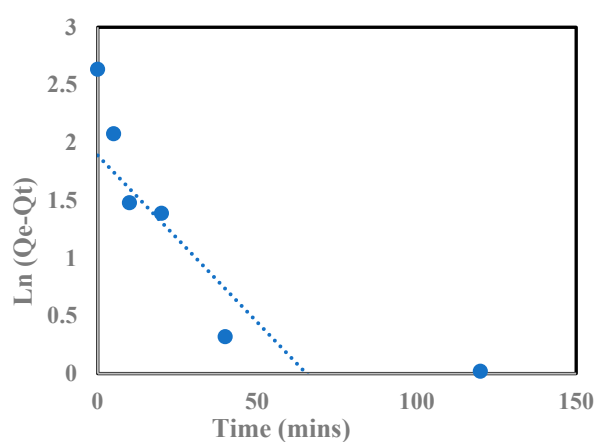

(a)

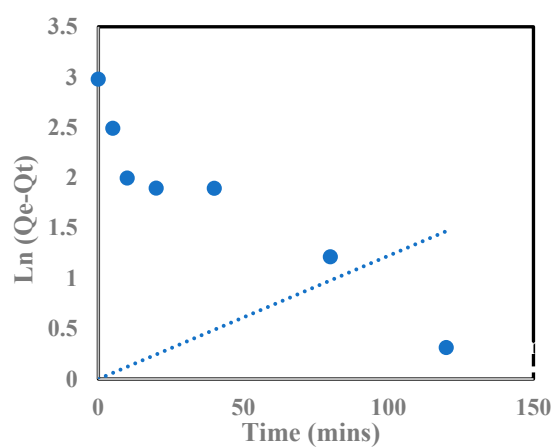

(b)

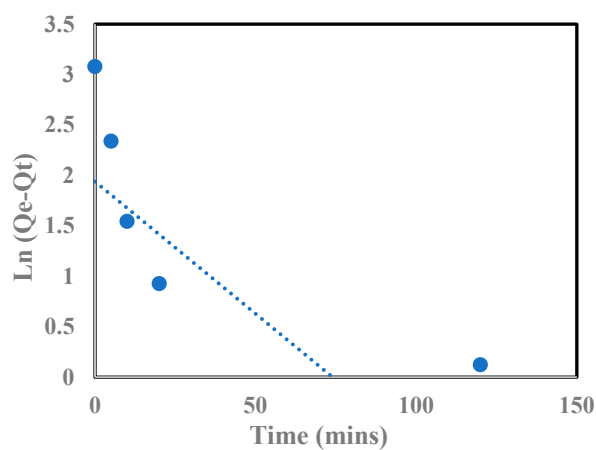

(c)

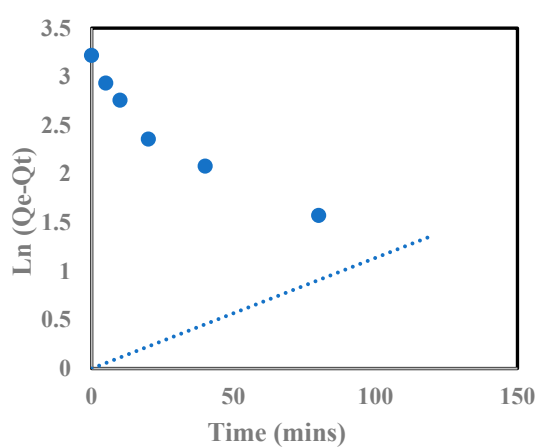

(d)

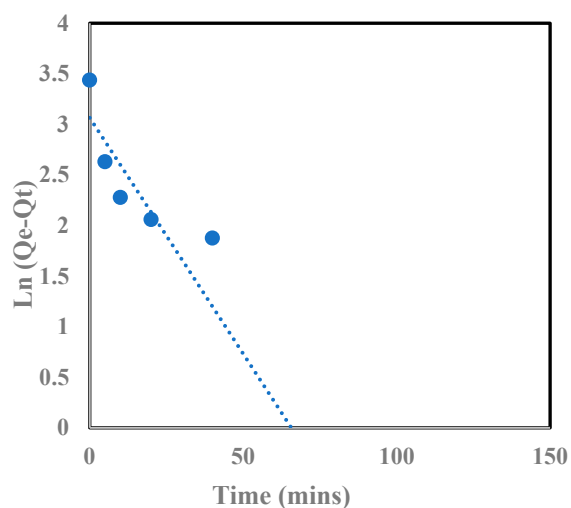

(e)

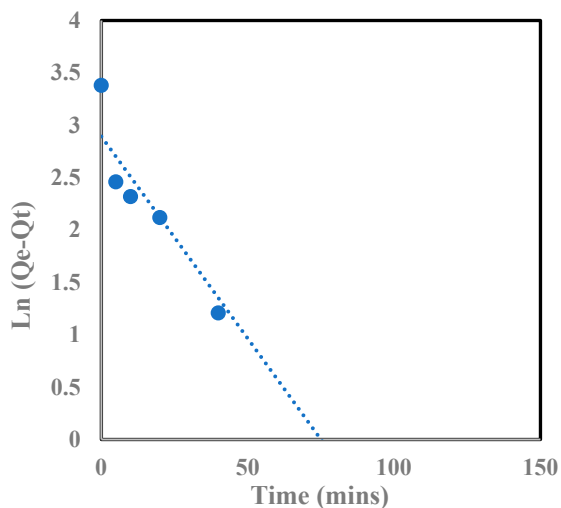

(f)

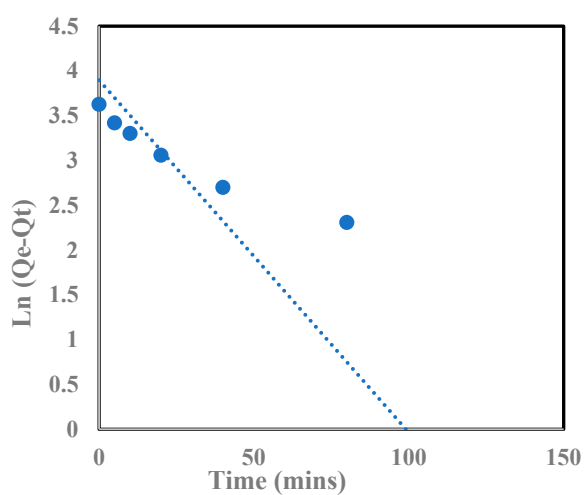

(g)

Figure S1: Pseudo 1<sup>st</sup> order model for: a) Contaminant AT; b) Contaminant CB; c) Contaminant CPF; d) IBU; e) Contaminant MeO; f) Contaminant MeR; g) Contaminant RD.

| Dosages (mL) | MeR<br>R.E% | MeO<br>R.E% | RD R.E% | AT R.E% | CPF<br>R.E% | CB R.E% | IBU R.E% |
|--------------|-------------|-------------|---------|---------|-------------|---------|----------|
| 0.5          | 38.51       | 72.96       | 51.41   | 15.15   | 58.40       | 15.32   | 11.06    |
| 1.0          | 73.36       | 77.71       | 59.5    | 34.87   | 54.2        | 49.17   | 62.53    |
| 1.5          | 75.73       | 93.44       | 75.42   | 37.14   | 56.74       | 62.04   | 83.72    |
| 2.0          | 84.75       | 94.86       | 83.3    | 49.82   | 71.49       | 64.35   | 94.14    |
| 2.5          | 89.03       | 92.91       | 91.72   | 49.88   | 73.88       | 68.04   | 92.43    |
| 3.0          | 92.76       | 93.83       | 87.64   | 53.31   | 77.52       | 70.72   | 94.28    |

Table S1: Summary of Equilibrium study of greener PG on seven emerging contaminants

| SA <sup>a</sup> (m <sup>2</sup> g <sup>-1</sup> ) | PV <sup>b</sup> (cm <sup>3</sup> g <sup>-1</sup> ) | PD <sup>c</sup> (nm) |
|---------------------------------------------------|----------------------------------------------------|----------------------|
| 289.146m <sup>2</sup> g <sup>-1</sup>             | 0.255 cc/g                                         | 3.169nm              |

Table S2: Parameters of the greener PG sample obtained from the N<sub>2</sub> adsorption-desorption isotherms.

a: BET surface area

b: Pore volume-DFT desorption cumulative volume of the pores

c: Pore diameter- average pore diameter determined by the BJH method.

Pore width: 3.169nm

Mesopore vol: 0.255 cc/g

Total pore volume: 2.738e-01 cc/g for

| CONTAMINANT         | Freundlich Isotherm Model                                                                                                      | Langmuir Isotherm Model                                                                                      | Temkin Isotherm Model                                                            |
|---------------------|--------------------------------------------------------------------------------------------------------------------------------|--------------------------------------------------------------------------------------------------------------|----------------------------------------------------------------------------------|
| ATENOLOL (AT)       | $K_f (\{ \text{mg/g} \} \{ \text{mg/l} \}^{1/m}) = 1889117.276$<br><br>$m = 1/n = -2.02$<br><br><b><math>R^2 = 0.93</math></b> | $Q_{\text{max}} (\text{mg/g}) = 3.79$<br>$K_L (\text{l/mg}) = -0.24$<br><br>$R^2 = 0.77$                     | $K_t (\text{L/mg}) = 0.90$<br>$B_t (\text{J/mol}) = -25.32$<br><br>$R^2 = 0.92$  |
| CARBAMAZEPINE (CB)  | $K_f (\{ \text{mg/g} \} \{ \text{mg/l} \}^{1/m}) = 154.54$<br><br>$m = 1/n = -1.43$<br><b><math>R^2 = 0.92</math></b>          | $Q_{\text{max}} (\text{mg/g}) = 5.15$<br>$K_L (\text{l/mg}) = -9.77$<br><br>$R^2 = 0.73$                     | $K_t (\text{L/mg}) = 0.083$<br>$B_t (\text{J/mol}) = -20.99$<br><br>$R^2 = 0.98$ |
| IBUPROFEN (IBU)     | $K_f (\{ \text{mg/g} \} \{ \text{mg/l} \}^{1/m}) = 34.05894$<br><br>$m = 1/n = -0.69$<br><b><math>R^2 = 0.764</math></b>       | $Q_{\text{max}} (\text{mg/g}) = 7.61$<br>$K_L (\text{l/mg}) = -0.0104$<br><br>$R^2 = 0.390$                  | $K_t (\text{L/mg}) = 0.04$<br>$B_t (\text{J/mol}) = -11.55$<br><br>$R^2 = 0.89$  |
| CIPROFLOXACIN (CPF) | $K_f (\{ \text{mg/g} \} \{ \text{mg/l} \}^{1/m}) = 47.75$<br><br>$m = -0.507$<br><b><math>R^2 = 0.98</math></b>                | $Q_{\text{max}} (\text{mg/g}) = 17.15$<br>$K_L (\text{l/mg}) = -0.003$<br><br><b><math>R^2 = 0.95</math></b> | $K_t (\text{L/mg}) = 0.041$<br>$B_t (\text{J/mol}) = -13.26$<br><br>$R^2 = 0.99$ |
| METHYL RED (MeR)    | $K_f (\{ \text{mg/g} \} \{ \text{mg/l} \}^{1/m}) = 4227.29$<br><br>$m = 1/n = -0.39$<br><b><math>R^2 = 0.82</math></b>         | $Q_{\text{max}} (\text{mg/g}) = 19.799$<br>$K_L (\text{l/mg}) = -0.0011$<br><br>$R^2 = 0.46$                 | $K_t (\text{L/mg}) = 0.024$<br>$B_t (\text{J/mol}) = -9.911$<br><br>$R^2 = 0.89$ |

|                        |                                                                                                  |                                                                                               |                                                                                       |
|------------------------|--------------------------------------------------------------------------------------------------|-----------------------------------------------------------------------------------------------|---------------------------------------------------------------------------------------|
| METHYL ORANGE<br>(MeO) | $K_f (\{ \text{mg/g} \} \{ \text{mg/l} \}^{1/m}) = 34.74$<br><br>$m=1/n= -0.15$<br>$R^2 = 0.98$  | $Q_{\text{max}} (\text{mg/g}) = 28.52$<br>$K_L (\text{l/mg}) = -0.00018$<br><br>$R^2 = 0.92$  | $K_t (\text{L/mg}) = 0.001$<br>$B_t (\text{J/mol}) = -5.31$<br><br>$R^2 = 0.988$      |
| RHODAMINE-B (Rd)       | $K_f (\{ \text{mg/g} \} \{ \text{mg/l} \}^{1/m}) = 156.3$<br><br>$m=1/n= -0.046$<br>$R^2 = 0.98$ | $Q_{\text{max}} (\text{mg/g}) = 155.54$<br>$K_L (\text{l/mg}) = 24197.99$<br><br>$R^2 = 0.94$ | $K_t (\text{L/mg}) = 2.9e^{-10}$<br>$B_t (\text{J/mol}) = -7.122$<br><br>$R^2 = 0.98$ |

Table S3: Linear adsorption isotherm parameters for all seven contaminants, removal by greener PG.
